# Supplementary material for: Application of a Flow-Based Hollow-Fiber Co-Culture System to Study Cellular Influences under Hyperglycemic Conditions
Source: PubMed Central journal article supplement (PMC6405855; doi:10.1038/s41598-019-40555-0), 2019-03-07

## Supplementary Information

### Application of a Flow-Based Hollow-Fiber Co-Culture System to Study Cellular Influences under Hyperglycemic Conditions

Abdul Shukkur Ebrahim, Thomas W. Carion, Eliisa Strand, Laura A. Young, Haoshen Shi and Elizabeth A. Berger

**Figure S1:** Images of full length blots of VEGF (**A**) and  $\beta$ -actin (**B**) in HRECs cultured in normal and high glucose using the flow-based hollow-fiber system. Lanes 1, 3, 5 = normal glucose; lanes 2, 4, 6 = high glucose. These images are shown as cropped in Figure 1.

**Figure S2:** Images of full length blots of VEGF (**A**), ICAM-1 (**B**), VCAM-1 (**C**), and  $\beta$ -actin (**D**) in HRECs cultured in normal and high glucose using the flow-based hollow-fiber system co-cultured with mouse-derived PMN. Lanes 1, 3, 5 = normal glucose; lanes 2, 4, 6 = high glucose. These images are shown as cropped in Figure 2.

**Figure S3:** Images of full length blots of COX-2 (**A**), 5-LOX (**B**), 12/15-LOX (**C**), and  $\beta$ -actin (**D**) in PMNs cultured in normal and high glucose using the flow-based hollow-fiber system co-cultured with HRECs. Lanes 1, 3, 5 = normal glucose; lanes 2, 4, 6 = high glucose. These images are shown as cropped in Figure 3.

**Figure S1.**

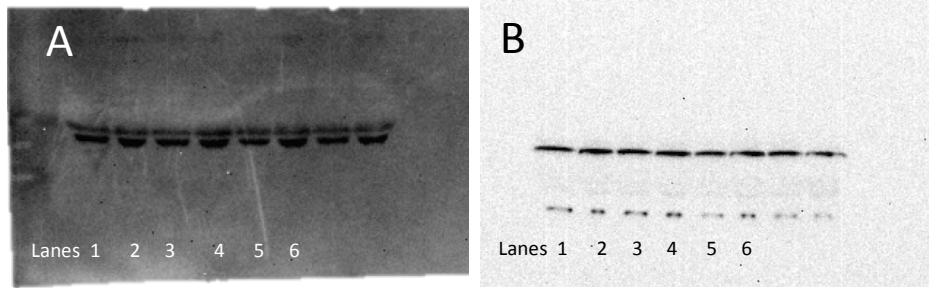

Figure S2.

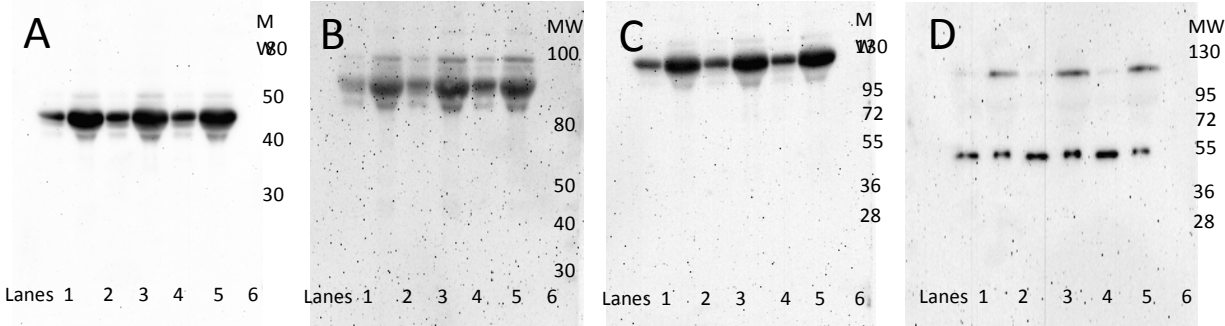

**Figure S3.**

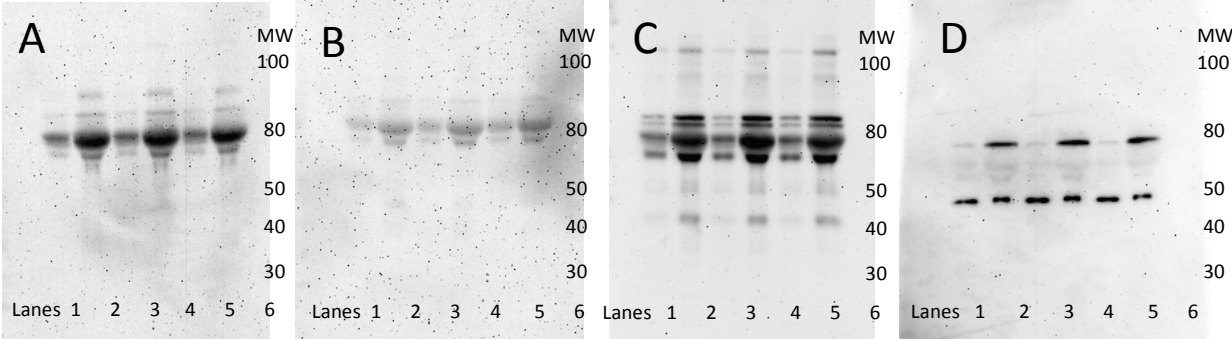

Supplement: 41598_2019_40555_MOESM1_ESM.pdf [file 41598_2019_40555_MOESM1_ESM.pdf]
